# Supplementary material for: Putative C2H2 Transcription Factor AflZKS3 Regulates Aflatoxin and Pathogenicity in Aspergillus flavus
Source: MDPI journal article supplement (doi:10.3390/toxins14120883), 2022-12-17
Supplement: s1 [file toxins-2060713-supplementary.pdf › toxins-2060713-supplementary.pdf]

## Supplementary Materials

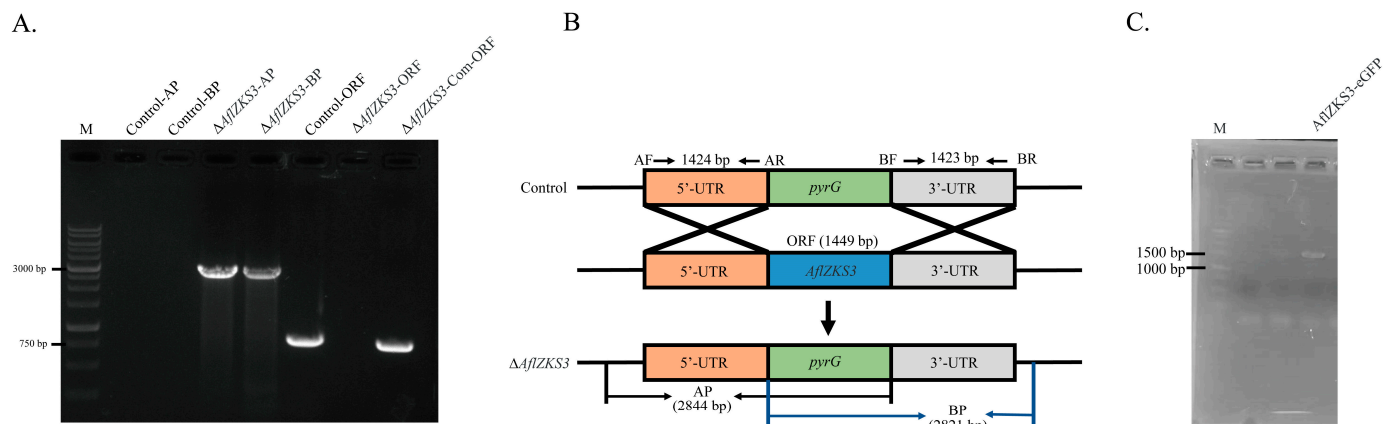

**Figure S1.** Construction and verification of  $\Delta AflZKS3$ ,  $\Delta AflZKS3$ -Com and  $AflZKS3$ -eGFP strains. (A) Verification of  $\Delta AflZKS3$  and  $\Delta AflZKS3$ -Com strains. Control-AP and  $\Delta AflZKS3$ -AP were amplified with primers  $AflZKS3$ -del-1 and  $pyrG$ -R. Control-BP and  $\Delta AflZKS3$ -BP were amplified with primers  $pyrG$ -F and  $AflZKS3$ -del-4. AP represented a fragment including the upstream homologous arm of  $AflZKS3$  and  $pyrG$ , and BP represented a fragment including  $pyrG$  and the downstream homologous arm of  $AflZKS3$ . Control-ORF,  $\Delta AflZKS3$ -ORF and  $\Delta AflZKS3$ -Com-ORF were amplified with primers  $AflZKS3$ -iden-1 and  $AflZKS3$ -iden-2 localized with the ORF of  $AflZKS3$ ; (B) Schematic diagram of  $\Delta AflZKS3$  strain construction; (C) Verification of  $AflZKS3$ -eGFP strain.  $AflZKS3$ -eGFP were amplified with primers  $AflZKS3$ -iden-1 and  $AflZKS3$ -eGFP-4 to ensure the fusion protein  $AflZKS3$ -eGFP was constructed successfully.

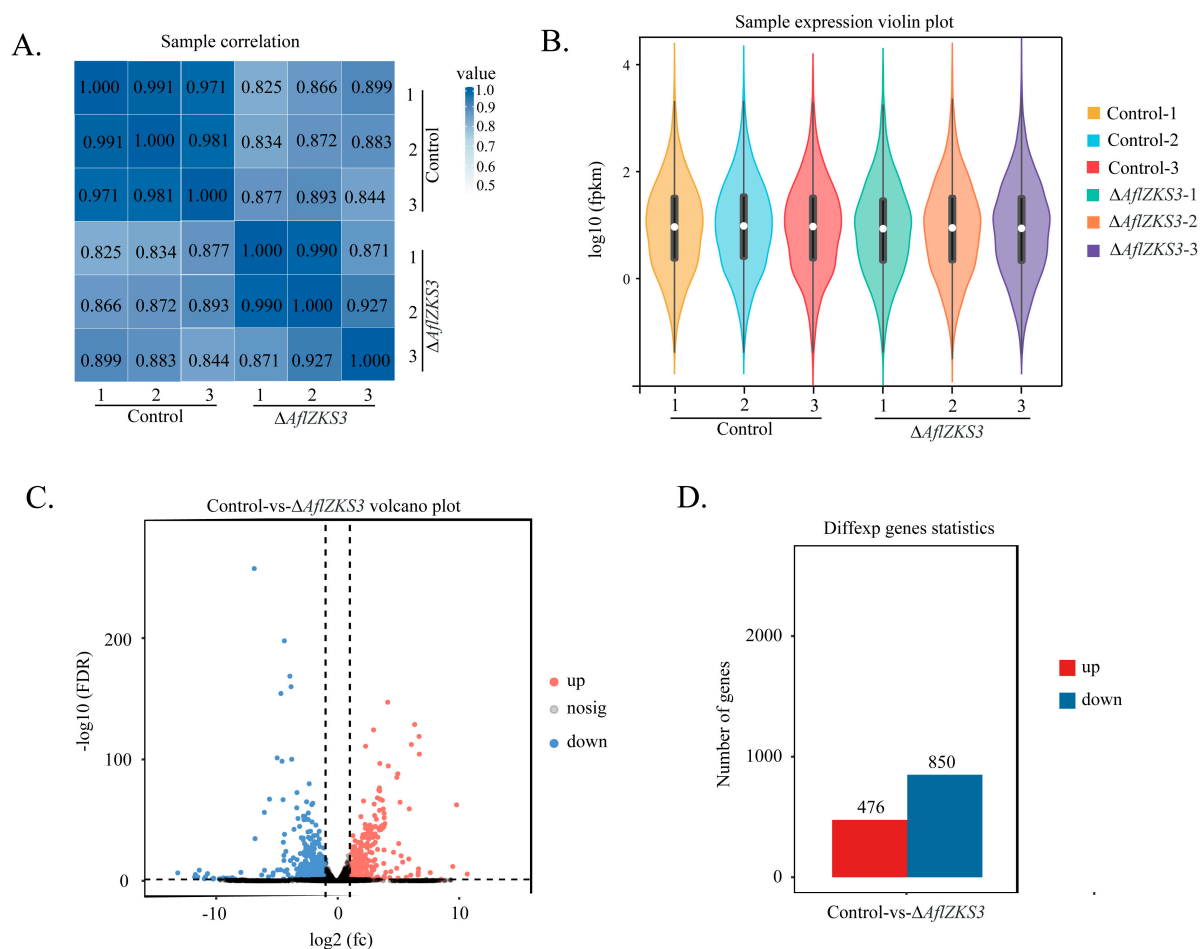

**Figure S2.** Quality control of samples and overview of DEGs. (A) Person correlation coefficient analysis; (B) Violin plot; (C) Volcano map of DEGs; (D) Number of DEGs.

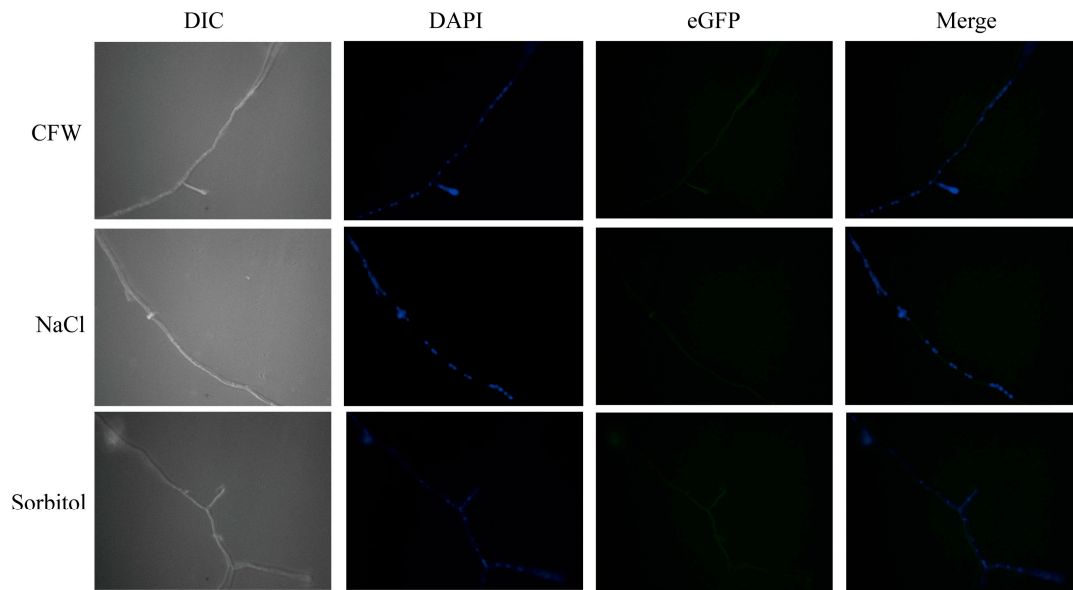

**Figure S3.** Location of *AflZKS3-eGFP* in *A. flavus* in the presence of CFW, NaCl and sorbitol.

**Table S1.** Primers used in this study.

| Primer name           | Sequence (5'-3')                                        | Application                                     |
|-----------------------|---------------------------------------------------------|-------------------------------------------------|
| <i>AflZKS3-del-1</i>  | ctagaggatctactagtcatatggattTCATCTACTGTTTTCCACCCCCT      | $\Delta$ <i>AflZKS3</i> strain construction     |
| <i>AflZKS3-del-2</i>  | ctgcggcgcggttctcgaggaagtgcAGGGACGGTAGTCAAGGACAAAT       |                                                 |
| <i>AflZKS3-del-3</i>  | atgtgtaacggtattgactaaaagggAGTCTCAATGATCGGCAGGACCTCT     |                                                 |
| <i>AflZKS3-del-4</i>  | tcgagctcgggtaccggggatccgattCAGACTCAATAGCCGACAGCAAGAC    |                                                 |
| <i>AflZKS3-iden-1</i> | CGTGTCGCTATACTTCATTTGG                                  |                                                 |
| <i>AflZKS3-iden-2</i> | TCATCTCGTAGTTCTCCGGTTC                                  |                                                 |
| pyrG-F                | GCAACTTCCTCGAGAACGCGCCGCA                               | $\Delta$ <i>AflZKS3-Com</i> strain construction |
| pyrG-R                | CCCTTTTAGTCAATACCGTTACACA                               |                                                 |
| <i>AflZKS3-com-1</i>  | AAACAGCTATGACCATGATTACGCCAGCTTGCAGCTTCACACCTGATAATA     | <i>AflZKS3-eGFP</i> strain construction         |
| <i>AflZKS3-com-2</i>  | GGCCAGTGAATTCGAGCTCGGTACCCGTACGGCGGATATTAAATGGATGAG     |                                                 |
| <i>AflZKS3-eGFP-1</i> | AAACAGCTATGACCATGATTACGCCATTTTCTATTTGACTTGAAGTCCACG     | qRT-PCR                                         |
| <i>AflZKS3-eGFP-2</i> | AATTTTTGGCTTCATCTCGTAGTTC                               |                                                 |
| <i>AflZKS3-eGFP-3</i> | GAACTACGAGATGAAGCCAAAAATTggcgagggcgccggcgagggcgccggcgca |                                                 |
| <i>AflZKS3-eGFP-4</i> | GGCCAGTGAATTCGAGCTCGGTACCCCGGAGATCCTGATCATCCGTGAGA      |                                                 |
| <i>aflB-F</i>         | GCCATTCACCAAGTCATACA                                    | qRT-PCR                                         |
| <i>aflB-R</i>         | AACCTACGCTCAAATCCGAT                                    |                                                 |
| <i>aflF-F</i>         | CGCAAACCTTCAGACAACCTA                                   |                                                 |
| <i>aflF-R</i>         | ATCCCTTTATCTGAGCACGA                                    |                                                 |
| <i>aflQ-F</i>         | GTCGCATATGCCCCGGTTCGG                                   |                                                 |
| <i>aflQ-R</i>         | GGCAACCAGTCGGGTTCCGG                                    |                                                 |
| <i>FLOT1-F</i>        | GATGTTGCTGAGGCACGGAT                                    |                                                 |
| <i>FLOT1-R</i>        | CCAGTGTCCAAATCAGCAAG                                    |                                                 |
| actin-F               | ACGGTGTCGTCACAAACTGG                                    |                                                 |
| actin-R               | CGGTTGGACTTAGGGTTGATAG                                  |                                                 |
